# Supplementary material for: Emerging investigator series: disaggregating residential sector high-resolution smart water meter data into appliance end-uses with unsupervised machine learning
Source: Royal Society of Chemistry journal article supplement (doi:10.1039/d0ew00724b), 2021-01-01
Supplement: d0ew00724b1.pdf [file d0ew00724b1.pdf]

*Environmental Science: Water Research and Technology*

Supporting Information for

**Disaggregating Residential Sector High-Resolution Smart Water Meter Data into  
Appliance End-Uses with Unsupervised Machine Learning**

*Gabrielle M. Bethke<sup>1</sup>, Abigail R. Cohen<sup>1</sup>, and Ashlynn S. Stillwell<sup>1</sup>*

*<sup>1</sup>Civil and Environmental Engineering, University of Illinois at Urbana-Champaign*

**Contents of this file**

Figure SI1

Table SI1 to SI3

**Introduction**

During the initial smart water meter installation, we conducted a water audit with one of the home occupants, using the form shown in Figure SI1. This data collection included only factual data such that this work was determined not to meet the definition of human subjects research and, therefore, did not require Institutional Review Board (IRB) approval. Documentation of this IRB decision is available upon request.



## Residential Water Use Survey

Date: \_\_\_\_\_  
 Researcher: \_\_\_\_\_  
 Address: \_\_\_\_\_

ID CODE: \_\_\_\_\_

### Household Information

Number of Occupants: \_\_\_\_\_  
 Age of Occupants: \_\_\_\_\_ Adults (18+) \_\_\_\_\_ Teenagers (13-17) \_\_\_\_\_ Children (under 13)  
 Sq. Footage of Home: \_\_\_\_\_  
 Lot Size: \_\_\_\_\_  
 Year Home Built/Approx. Age: \_\_\_\_\_  
 Rent/Own: \_\_\_\_\_  
 Approx. Market Value: \_\_\_\_\_  
 Water Heater Energy Source (Circle): Electricity Natural Gas Propane Other \_\_\_\_\_  
 Are there any known leaks or dripping taps in the home? Where? \_\_\_\_\_  
 \_\_\_\_\_

### Type of Residence

\_\_\_\_\_ Single Family \_\_\_\_\_ Town House  
 \_\_\_\_\_ Apartment Complex \_\_\_\_\_ Mobile Home  
 \_\_\_\_\_ Duplex/Triples \_\_\_\_\_ Other (please specify) \_\_\_\_\_

Can the researcher take photos of the fixtures/appliances?

☐ Yes ☐ No

| END-USES |                      | COUNT | BRAND/YEAR | MODEL NO. | NOTES (Tank or Flush Style; 1.6/1.28 gpf; Dual Flush; Low Flow Shower Head; Pipe Sizing; Meter Size; Location) |
|----------|----------------------|-------|------------|-----------|----------------------------------------------------------------------------------------------------------------|
| KITCHEN  | Dishwasher           |       |            |           |                                                                                                                |
|          | Ice Maker            |       |            |           |                                                                                                                |
|          | Kitchen Sink         |       |            |           |                                                                                                                |
| BATHROOM | Toilet               |       |            |           |                                                                                                                |
|          | Bathtub w/ Shower    |       |            |           |                                                                                                                |
|          | Bathtub Only         |       |            |           |                                                                                                                |
|          | Shower Only          |       |            |           |                                                                                                                |
|          | Tub w/ Jets          |       |            |           |                                                                                                                |
|          | Bathroom Sink        |       |            |           |                                                                                                                |
| UTILITY  | Top Load C. Washer   |       |            |           |                                                                                                                |
|          | Front Load C. Washer |       |            |           |                                                                                                                |
|          | Utility Sink         |       |            |           |                                                                                                                |
| OUTDOOR  | Swimming Pool        |       |            |           |                                                                                                                |
|          | Hot Tub              |       |            |           |                                                                                                                |
|          | Irrigation System    |       | --         | --        |                                                                                                                |
|          | Hose Bib             |       |            |           |                                                                                                                |
| OTHER    | Water Powered Sump   |       |            |           |                                                                                                                |
|          | Humidifier           |       |            |           |                                                                                                                |
|          | Water Softener       |       |            |           |                                                                                                                |
|          | Reverse Osmosis      |       |            |           |                                                                                                                |
|          | Other                |       |            |           |                                                                                                                |
|          | Other                |       |            |           |                                                                                                                |

**Figure SI1.** Blank water audit form to document appliances/fixtures in the study home.



We compared the results of the  $k$ -means clustering disaggregation algorithm with measured training data from the test home and the reported manufacturers' ratings for appliances/fixtures. This comparison is reported in Table SI1.

$k$ -means clustering is an unsupervised machine learning method that is used to classify data through a predetermined number of clusters. The  $k$ -means algorithm minimizes the objective function known as a squared error function, as shown in Equation SI1.

$$J(V) = \sum_{i=1}^C \sum_{j=1}^{C_i} (\|x_i - v_i\|)^2 \quad \text{Equation SI1}$$

where  $x_i$  is a data point,  $v_i$  is a center,  $\|x_i - v_i\|$  is the Euclidean distance between  $x_i$  and  $v_i$ ,  $C_i$  is the number of data points in the  $i^{\text{th}}$  cluster,  $C$  is the number of cluster centers.

Comparing the measured values for the end uses throughout the home to the manufacturers' ratings can support further analyses of the actual function of the end uses. Previous studies that compared actual measurements to manufacturers' ratings did not go in depth into all appliances nor have they been on a large scale. Mead and Aravinthan (2009) examined 10 households with smart water meters and compared the water use to manufacturers' estimates at the time, although not the specific models installed in the households. However, most of the discrepancies between the measured water consumption and the manufacturers' estimates were attributed to human behaviors (such as holding down a toilet flush lever too long) or errors in data disaggregation (such as humans using a faucet immediately after using a fixture like a toilet). A more extensive comparison of exact models installed within homes surveyed has not been examined before, to our knowledge.

In addition to analyzing how the existing appliances/fixtures in the home performed compared to their ratings, these appliances/fixtures were also compared to others currently available on the market. These findings are displayed in Tables SI2 and SI3. *Consumer Reports* ratings were used for the year 2018 to find the top fixtures and appliances sold to the public in the United States, as ratings for 2019 were not yet available when conducting the study (Consumer Reports, 2018b, 2018a, 2018c). The 15 highest-rated appliances/fixtures in each end-use category were investigated to determine water use, most commonly from online appliance/fixture manuals. Most appliance/fixture manuals had the water use listed; however, for some, like many of the washing machines, the water use was not in the manual and we located through the Energy Star website.

Washing machine manuals often reported the integrated water factor more than the total water use, yet integrated water factors were also not reported for several washing machine models. For the faucets and showers, there were no *Consumer Reports* ratings, so top manufacturers were selected by searching popular brands at major U.S. department stores and analyzing consumer reports articles on various manufacturers. These data were used to compare to the appliances installed at the study home, as well as to Energy Star and WaterSense criteria reported by the U.S. Environmental Protection Agency. Energy Star ratings applied to washing machines and dishwashers, while WaterSense rates some fixtures, such as toilets and faucets. WaterSense only rates washing machines and dishwashers on a household scale, not by individual appliance. Many of the top-rated appliances/fixtures from *Consumer Reports*, shown in Tables SI2 and SI3, were from the same companies. However, this level of popularity does not necessarily reflect what the general public has widely installed in homes. Furthermore, almost all of the



dishwashers and washing machines listed were Energy Star certified as this label has become a more common and desirable rating in recent years (Ward et al., 2011).



**Table SI1:** The disaggregated water meter data were reasonably aligned with the manufacturers' ratings.

| End-Use                | Make/Model                           | Manufacturer's Rating*<br>(vol/max flow)                     | Training Data<br>(vol/max flow) | Disaggregated<br>Data Coherence<br>(flow)                       | Disaggregated<br>Data<br>Coherence<br>(duration) |
|------------------------|--------------------------------------|--------------------------------------------------------------|---------------------------------|-----------------------------------------------------------------|--------------------------------------------------|
| <b>Washing Machine</b> | Samsung/Front Loading Clothes Washer | 39-53 L (10-15 gal) (Samsung, n.d.-c)                        | 44.7 L (11.8 gal)               | $16.54 \pm 0.16$ L/min ( $4.37 \pm 0.04$ gpm)                   | $36.2 \pm 9.0$ s                                 |
| <b>Dishwasher</b>      | Samsung/Rotary Dishwasher            | 11.7-27.2 L (3.1-7.2 gal) (Samsung, 2015)                    | 11.6 L (3.07 gal)               | $4.16 \pm 0.04$ L/min ( $1.10 \pm 0.01$ gpm)                    | $64.8 \pm 3.8$ s                                 |
| <b>Toilet</b>          | American Standard                    | 6.06 Lpf (1.6 gpf)                                           | 7.04 Lpf (1.86 gpf)             | $7.51 \pm 0.10$ L/min ( $1.98 \pm 0.02$ gpm)                    | $58.8 \pm 1.8$ s                                 |
|                        |                                      |                                                              | 5.53 Lpf (1.46 gpf)             | $5.98 \pm 0.02$ L/min ( $1.57 \pm 0.01$ gpm)                    | $58.0 \pm 6.0$ s                                 |
|                        |                                      |                                                              | 6.66 Lpf (1.76 gpf)             | $3.90 \pm 0.09$ L/min ( $1.03 \pm 0.02$ gpm)                    | $113.1 \pm 1.3$ s                                |
| <b>Faucet</b>          | Delta (kitchen)                      | 6.8 L/min (1.8 gpm) (Delta, n.d.-f)                          | 6.44 L/min (1.70 gpm)           | Low Flow: 1.48 L/min (0.39 gpm) <sup>a</sup>                    | Low Flow: 12.8 s <sup>a</sup>                    |
|                        | Pfister (bathroom)                   | 4.5 L/min (1.2 gpm) <sup>b</sup> (Pfister, n.d.)             | 6.09 L/min (1.61 gpm)           |                                                                 |                                                  |
|                        | American Standard (bathroom)         | 5.7 L/min (1.5 gpm) <sup>b</sup> (American Standard, n.d.-f) | 5.83 L/min (1.54 gpm)           | Medium Flow: 2.69 to 6.74 L/min (0.71 to 1.78 gpm) <sup>a</sup> | Medium Flow: 21.3 to 78.3 s <sup>a</sup>         |
|                        | Delta (bathroom)                     | 4.5 L/min (1.2 gpm) <sup>b</sup> (Delta, n.d.-e)             | 9.39 L/min (2.48 gpm)           |                                                                 |                                                  |
|                        | Price Pfister (utility)              | Unavailable                                                  | 19.0 L/min (5.02 gpm)           |                                                                 |                                                  |
|                        | Delta (tub)                          | 32.6 L/min (8.6 gpm) <sup>b</sup>                            | 23.2 L/min (6.12 gpm)           |                                                                 |                                                  |
|                        | Delta (tub)                          | 32.6 L/min (8.6 gpm) <sup>b</sup>                            | 16.1 L/min (4.26 gpm)           |                                                                 |                                                  |
|                        | Delta (tub)                          | 32.6 L/min (8.6 gpm) <sup>b</sup>                            | 20.2 L/min (5.33 gpm)           |                                                                 |                                                  |
|                        | Woodford (hose bib)                  | Unavailable                                                  | 26.2 L/min (6.93 gpm)           |                                                                 |                                                  |
|                        | Woodford (hose bib)                  | Unavailable                                                  | 30.0 L/min (7.92 gpm)           |                                                                 |                                                  |
| <b>Shower</b>          | Delta                                | 9.5 L/min (2.5 gpm)                                          | 9.01 L/min (2.38 gpm)           | $7.92 \pm 0.11$ L/min ( $2.09 \pm 0.03$ gpm) <sup>a</sup>       | $854 \pm 131$ s <sup>a</sup>                     |
|                        | Moen                                 | 9.5 L/min (2.5 gpm)                                          | 9.24 L/min (2.44 gpm)           |                                                                 |                                                  |
|                        | Target                               | 9.5 L/min (2.5 gpm)                                          | 8.48 L/min (2.24 gpm)           |                                                                 |                                                  |



**Table SI2:** Efficiency ratings are available for several popular automatic appliances/fixtures in the United States.

| End-Use                                            | Energy Star<br>or<br>WaterSense<br>Criteria<br>(United States<br>Environment<br>Protection<br>Agency (US<br>EPA), 2008) | Most Popular Make/Model                                                                                                                                                                                                                                                                                     | Rating                                                                                                                                                                                                                                                                                                                                                                                                                                                                                                                                                                                                                                                                                                                                                                                                                                                                                                                                                                                                                                                                            | Reference for Rating                                                                                                                                                                                                                                                                                                                           |
|----------------------------------------------------|-------------------------------------------------------------------------------------------------------------------------|-------------------------------------------------------------------------------------------------------------------------------------------------------------------------------------------------------------------------------------------------------------------------------------------------------------|-----------------------------------------------------------------------------------------------------------------------------------------------------------------------------------------------------------------------------------------------------------------------------------------------------------------------------------------------------------------------------------------------------------------------------------------------------------------------------------------------------------------------------------------------------------------------------------------------------------------------------------------------------------------------------------------------------------------------------------------------------------------------------------------------------------------------------------------------------------------------------------------------------------------------------------------------------------------------------------------------------------------------------------------------------------------------------------|------------------------------------------------------------------------------------------------------------------------------------------------------------------------------------------------------------------------------------------------------------------------------------------------------------------------------------------------|
| <b>Washing<br/>Machine –<br/>Front<br/>Loading</b> | 802.09<br>L/m <sup>3</sup> /cycle (6<br>gal/ft <sup>3</sup> /cycle)                                                     | LG WM9000HVA<br>LG WM5000HWA<br>LG Signature WM49500HKA<br>LG WM500SHKA<br>LG WM4370HWA<br>LG WM3670HWA<br>Maytag MHW8200FW<br>LG WM3770HWA<br>Samsung WF50K7500AW<br>Samsung FlexWash WV60M9900AV<br>Samsung WF45K6500AW<br>Maytag MHW3505FW<br>LG WM8100HWA<br>Kenmore Elite 41982<br>Kenmore Elite 41072 | 428 L/m <sup>3</sup> /cycle (3.2 gal/ft <sup>3</sup> /cycle) <sup>a</sup><br>374 L/m <sup>3</sup> /cycle (2.8 gal/ft <sup>3</sup> /cycle) <sup>a</sup><br>Unavailable online<br>Unavailable online<br>428 L/m <sup>3</sup> /cycle (3.2 gal/ft <sup>3</sup> /cycle) <sup>a</sup><br>428 L/m <sup>3</sup> /cycle (3.2 gal/ft <sup>3</sup> /cycle) <sup>a</sup><br>428 L/m <sup>3</sup> /cycle (3.2 gal/ft <sup>3</sup> /cycle) <sup>a</sup><br>428 L/m <sup>3</sup> /cycle (3.2 gal/ft <sup>3</sup> /cycle) <sup>a</sup><br>388 L/m <sup>3</sup> /cycle (2.9 gal/ft <sup>3</sup> /cycle) <sup>a</sup><br>388 L/m <sup>3</sup> /cycle (2.9 gal/ft <sup>3</sup> /cycle) <sup>a</sup><br>401 L/m <sup>3</sup> /cycle (3.0 gal/ft <sup>3</sup> /cycle) <sup>a</sup><br>428 L/m <sup>3</sup> /cycle (3.2 gal/ft <sup>3</sup> /cycle) <sup>a</sup><br>428 L/m <sup>3</sup> /cycle (3.2 gal/ft <sup>3</sup> /cycle) <sup>a</sup><br>428 L/m <sup>3</sup> /cycle (3.2 gal/ft <sup>3</sup> /cycle) <sup>a</sup><br>401 L/m <sup>3</sup> /cycle (3.0 gal/ft <sup>3</sup> /cycle) <sup>a</sup> | (LG, n.d.-b)<br>(Energy Star, n.d.)<br><br><br>(Energy Star, n.d.)<br>(Energy Star, n.d.)<br>(Energy Star, n.d.)<br>(Energy Star, n.d.)<br>(Energy Star, n.d.)<br>(Samsung, n.d.-b)<br>(Energy Star, n.d.)<br>(Samsung, n.d.-a)<br>(Energy Star, n.d.)<br>(Energy Star, n.d.)<br>(Energy Star, n.d.)<br>(Kenmore, n.d.-l)<br>(Kenmore, n.d.-k) |



Table SI2 Cont.

| End-Use                              | Energy Star/WaterSense Criteria                               | Most Popular Make/Model                                                                                                                                                                                                                                                                                                    | Rating                                                                                                                                                                                                                                                                                                                                                                                                                                                                                                                                                                                                                                                                                                                                                                                                                                                                                                                                                                                                                                                                                                             | Reference for Rating                                                                                                                                                                                                                                                                                          |
|--------------------------------------|---------------------------------------------------------------|----------------------------------------------------------------------------------------------------------------------------------------------------------------------------------------------------------------------------------------------------------------------------------------------------------------------------|--------------------------------------------------------------------------------------------------------------------------------------------------------------------------------------------------------------------------------------------------------------------------------------------------------------------------------------------------------------------------------------------------------------------------------------------------------------------------------------------------------------------------------------------------------------------------------------------------------------------------------------------------------------------------------------------------------------------------------------------------------------------------------------------------------------------------------------------------------------------------------------------------------------------------------------------------------------------------------------------------------------------------------------------------------------------------------------------------------------------|---------------------------------------------------------------------------------------------------------------------------------------------------------------------------------------------------------------------------------------------------------------------------------------------------------------|
| <b>Washing Machine – Top Loading</b> | 802.09 L/m <sup>3</sup> /cycle (6 gal/ft <sup>3</sup> /cycle) | LG WT5680HVA<br>LG WT7600HWA<br>LG WT7500CW<br>LG WT7700HVA<br>LG WT7200CW<br>LG WT1901CW<br>LG WT1150CW<br>Kenmore Elite 31552<br>LG WT1501CW<br>Kenmore Elite 31433<br>Whirlpool WTW8700EC<br>Kenmore 28132<br>Kenmore 26132<br>Kenmore 27132                                                                            | 495 L/m <sup>3</sup> /cycle (3.7 gal/ft <sup>3</sup> /cycle) <sup>a</sup><br>495 L/m <sup>3</sup> /cycle (3.7 gal/ft <sup>3</sup> /cycle) <sup>a</sup><br>495 L/m <sup>3</sup> /cycle (3.7 gal/ft <sup>3</sup> /cycle) <sup>a</sup><br>428 L/m <sup>3</sup> /cycle (3.2 gal/ft <sup>3</sup> /cycle) <sup>a</sup><br>495 L/m <sup>3</sup> /cycle (3.7 gal/ft <sup>3</sup> /cycle) <sup>a</sup><br>575 L/m <sup>3</sup> /cycle (4.3 gal/ft <sup>3</sup> /cycle) <sup>a</sup> | (Energy Star, n.d.)<br>(Energy Star, n.d.)<br>(Energy Star, n.d.)<br>(Energy Star, n.d.)<br>(Energy Star, n.d.)<br>(LG, n.d.-a)<br>(Energy Star, n.d.)<br>(Kenmore, n.d.-j)<br>(Energy Star, n.d.)<br>(Kenmore, n.d.-i)<br>(Energy Star, n.d.)<br>(Kenmore, n.d.-f)<br>(Kenmore, n.d.-d)<br>(Kenmore, n.d.-e) |
| <b>Dishwasher</b>                    | 15.1 L/cycle (4 gal/cycle)                                    | Bosch Ascenta SHX3AR75UC<br>KitchenAid KDTM354DSS<br>Bosch 300 series SHEM463W55N<br>Kenmore 14573<br>Kenmore 14543<br>Kenmore Elite 12793<br>Whirlpool WDF540PADM<br>Kenmore 14523<br>KitchenAid KDTM704ESS<br>Bosch 800 Series SHPM78WSSN<br>Kenmore Elite 14793<br>KitchenAid KDTM404ESS<br>Bosch 800 Series SHXM98W75N | 11.3-21.5 L/cycle (3.0-5.7 gal/cycle) <sup>a</sup><br>10.2-15.9 L/cycle (2.7-4.2 gal/cycle) <sup>a</sup><br>8.8-21.0 L/cycle (2.3-5.5 gal/cycle) <sup>a</sup><br>9.09-28.0 L/cycle (2.4-7.4 gal/cycle) <sup>a</sup><br>9.09-28.0 L/cycle (2.4-7.4 gal/cycle) <sup>a</sup><br>10.5-29.0 L/cycle (2.8-7.7 gal/cycle) <sup>a</sup><br>9.09-28.0 L/cycle (2.4-7.4 gal/cycle) <sup>a</sup><br>10.5-28.0 L/cycle (2.8-7.4 gal/cycle) <sup>a</sup><br>10.2-15.9 L/cycle (2.7-4.2 gal/cycle) <sup>a</sup><br>8.8-21.0 L/cycle (2.3-5.5 gal/cycle) <sup>a</sup><br>10.4-30.3 L/cycle (2.7-8.0 gal/cycle) <sup>a</sup><br>10.2-15.9 L/cycle (2.7-4.2 gal/cycle) <sup>a</sup><br>8.8-21.0 L/cycle (2.3-5.5 gal/cycle) <sup>a</sup>                                                                                                                                                                                                                                                                                                                                                                                            | (Bosch, n.d.-d)<br>(KitchenAid, n.d.-a)<br>(Bosch, n.d.-a)<br>(Kenmore, n.d.-c)<br>(Kenmore, n.d.-b)<br>(Kenmore, n.d.-g)<br>(Whirlpool, n.d.)<br>(Kenmore, n.d.-a)<br>(KitchenAid, n.d.-c)<br>(Bosch, n.d.-b)<br>(Kenmore, n.d.-h)<br>(KitchenAid, n.d.-b)<br>(Bosch, n.d.-c)                                |



Table SI2 Cont.

| End-Use | Energy Star/WaterSense Criteria | Most Popular Make/Model                                                                                                                                                                                                                                                                                                                                                                                                                                                                                                   | Rating                                                                                                                                                                                                                                                                                                                                                                                                                                                                       | Reference for Rating                                                                                                                                                                                                                                                                                                              |
|---------|---------------------------------|---------------------------------------------------------------------------------------------------------------------------------------------------------------------------------------------------------------------------------------------------------------------------------------------------------------------------------------------------------------------------------------------------------------------------------------------------------------------------------------------------------------------------|------------------------------------------------------------------------------------------------------------------------------------------------------------------------------------------------------------------------------------------------------------------------------------------------------------------------------------------------------------------------------------------------------------------------------------------------------------------------------|-----------------------------------------------------------------------------------------------------------------------------------------------------------------------------------------------------------------------------------------------------------------------------------------------------------------------------------|
| Toilet  | 4.85 Lpf (1.28 gpf)             | St. Thomas by Icera Richmond ECO (6123.218, 6125.028)<br>Kohler Highline Classic K-3493-0<br>American Standard Champion 4 Max 2586.128ST.020<br>Zurn Z5551-K<br>Kohler Kelston K-3754<br>Toto Drake CST744S<br>Toto Drake II CST454CEFG<br>American Standard Acticlean 714AA151.020<br>Delta Turner C43908-WH<br>Delta Prelude C43901-WH<br>Gerber Avalanche WS-21-818<br>Kohler SantaRosa K-3810<br>American Standard Clean 2514.101 (Lowe's)<br>Toto Eco Drake CST744E<br>Kohler Cimarron The Complete Solution K-11451 | 4.85 Lpf (1.28 gpf) <sup>b</sup><br><br>6.06 Lpf (1.6 gpf)<br>4.85 Lpf (1.28 gpf) <sup>b</sup><br><br>6.06 Lpf (1.6 gpf)<br>6.06 Lpf (1.6 gpf)<br>6.06 Lpf (1.6 gpf)<br>4.85 Lpf (1.28 gpf) <sup>b</sup><br>4.85 Lpf (1.28 gpf) <sup>b</sup><br><br>4.85 Lpf (1.28 gpf) <sup>b</sup><br>4.85 Lpf (1.28 gpf) <sup>b</sup><br>4.85 Lpf (1.28 gpf) <sup>b</sup><br>4.85 Lpf (1.28 gpf) <sup>b</sup><br><br>4.85 Lpf (1.28 gpf) <sup>b</sup><br>4.85 Lpf (1.28 gpf) <sup>b</sup> | (St. Thomas, n.d.)<br><br>(Kohler, n.d.-c)<br>(American Standard, n.d.-b)<br>(Zurn, n.d.)<br>(Kohler, n.d.-d)<br>(TOTO, n.d.-b)<br>(TOTO, n.d.-a)<br>(American Standard, n.d.-g)<br>(Delta, n.d.-g)<br>(Delta, n.d.-c)<br>(Gerber, n.d.)<br>(Kohler, n.d.-f)<br>(American Standard, n.d.-c)<br>(TOTO, n.d.-c)<br>(Kohler, n.d.-a) |

<sup>a</sup>Labeled Energy Star Certified

<sup>b</sup>Labeled WaterSense Certified



**Table SI3:** Efficiency ratings are available for several popular faucets in the United States.

| <b>End-Use</b>          | <b>WaterSense Criteria</b><br>(United States Environment Protection Agency (US EPA), 2008) | <b>Most Popular Make/Model</b>                                                         | <b>Rating</b>                                                                                                                                                                                                                                                 | <b>Reference for Rating</b>                                                                                                                                    |
|-------------------------|--------------------------------------------------------------------------------------------|----------------------------------------------------------------------------------------|---------------------------------------------------------------------------------------------------------------------------------------------------------------------------------------------------------------------------------------------------------------|----------------------------------------------------------------------------------------------------------------------------------------------------------------|
| <b>Kitchen Faucets</b>  | Purposefully not addressed                                                                 | Delta<br>Kohler<br>Moen<br>Brizo<br>Vigo<br>American Standard<br>Kraus                 | 5.68-15.1 L/min (1.5-4.0 gpm)<br>5.68-8.33 L/min (1.5-2.2 gpm)<br>Most 5.68 L/min (1.5 gpm)<br>Most 6.81 L/min (1.8 gpm)<br>6.81 L/min (1.8 gpm)<br>5.68-6.81 L/min (1.5-1.8 gpm)<br>6.81-8.33 L/min (1.8-2.2 gpm)                                            | (Delta, n.d.-b)<br>(Kohler, n.d.-e)<br>(Moen, n.d.-c)<br>(Brizo, n.d.-a)<br>(Vigo, n.d.-b)<br>(American Standard, n.d.-d)<br>(Kraus, n.d.-b)                   |
| <b>Bathroom Faucets</b> | 5.68 L/min max (1.5 gpm max)                                                               | Delta<br>Kohler<br>Moen<br>Brizo<br>Vigo<br>American Standard<br>Kraus                 | 1.89-5.68 L/min (0.5-1.5 gpm)<br>Most 4.54 L/min (1.2 gpm)<br>3.79-5.68 L/min (1.0-1.5 gpm)<br>Most 5.69 L/min (1.5 gpm)<br>4.54-5.68 L/min (1.2-1.5 gpm)<br>1.89-5.68 L/min (0.5-1.5 gpm)<br>4.54-5.68 L/min (1.2-1.5 gpm)                                   | (Delta, n.d.-a)<br>(Kohler, n.d.-b)<br>(Moen, n.d.-a)<br>(Brizo, n.d.-b)<br>(Vigo, n.d.-a)<br>(American Standard, n.d.-a)<br>(Kraus, n.d.-a)                   |
| <b>Showers</b>          | 9.46 L/min max (2.5 gpm max)                                                               | Delta<br>Kohler<br>Moen<br>Grohe<br>ALFI<br>American Standard<br>Hansgrohe<br>Speakman | 5.68-9.46 L/min (1.5-2.5 gpm)<br>5.68-9.46 L/min (1.5-2.5 gpm)<br>6.62-9.46 L/min (1.75-2.5 gpm)<br>Most 9.46 L/min (2.5 gpm)<br>Most 6.81 L/min (1.8 gpm)<br>5.68-9.46 L/min (1.5-2.5 gpm)<br>5.68-9.46 L/min (1.5-2.5 gpm)<br>5.68-9.46 L/min (1.5-2.5 gpm) | (Delta, n.d.-d)<br>(Kohler, n.d.-g)<br>(Moen, n.d.-b)<br>(Grohe, n.d.)<br>(ALFI, n.d.)<br>(American Standard, n.d.-e)<br>(Hansgrohe, n.d.)<br>(Speakman, n.d.) |



## References

ALFI. (n.d.) *Shower Heads*. Retrieved October 7, 2019, from <http://alfibrand.com/bath/tub-shower-fixtures/shower-heads.html>

American Standard. (n.d.-a). *Bathroom Sink Faucets*. Retrieved September 20, 2019, from <https://www.americanstandard-us.com/bathroom/bathroom-sink-faucets?page=1&plimit=21>

American Standard. (n.d.-b). *Champion 4 MAX Right Height Elongated 1.28 gpf Toilet*. Retrieved September 3, 2019, from <https://www.americanstandard-us.com/bathroom/toilets/champion-4-max-right-height-elongated-128-gpf-toilet-24326>

American Standard. (n.d.-c). *Clean Collection Clean High Efficiency Elongated 1.28 gpf Toilet*. Retrieved September 4, 2019, from <https://www.americanstandard-us.com/bathroom/toilets/clean-high-efficiency-elongated-128-gpf-toilet-21831>

American Standard. (n.d.-d). *Kitchen Faucets*. Retrieved September 13, 2019, from <https://www.americanstandard-us.com/kitchens/kitchen-faucets?page=1&plimit=21>

American Standard. (n.d.-e). *Shower Faucets*. Retrieved October 7, 2019, from <https://www.americanstandard-us.com/bathroom/shower-faucets?page=1&plimit=21>

American Standard. (n.d.-f). *Stratton 1-Handle 4 Inch Centerset Bathroom Faucet*. Retrieved June 29, 2019, from <https://www.americanstandard-us.com/bathroom/bathroom-sink-faucets/93/15/stratton-1-handle-4-inch-centerset-bathroom-faucet-26725>

American Standard. (n.d.-g). *VorMax Collection ActiClean Self-Cleaning Right Height Elongated 1.28 GPF Toilet*. Retrieved September 4, 2019, from <https://www.americanstandard-us.com/bathroom/toilets/acticlean-self-cleaning-right-height-elongated-128-gpf-toilet-24152>

Bosch. (n.d.-a). *300 Series Dishwasher 24'' Stainless steel*. Retrieved July 23, 2019, from <https://www.bosch-home.com/us/productslist/dishwashers/front-controls/SH6M63W55N>

Bosch. (n.d.-b). *800 Series Dishwasher 24'' Stainless steel*. Retrieved July 26, 2019, from <https://www.bosch-home.com/us/productslist/SHPM98W75N>

Bosch. (n.d.-d). *Ascenta® Dishwasher 24'' Stainless steel*. Retrieved July 23, 2019, from <https://www.bosch-home.com/us/productslist/dishwashers/top-controls/SHX3AR75UC>

Brizo. (n.d.-a). *Kitchen Faucets*. Retrieved September 13, 2019, from <https://www.brizo.com/kitchen/category/kitchen-faucets>

Brizo. (n.d.-b). *Lavatory Faucets*. Retrieved September 20, 2019, from <https://www.brizo.com/bath/category/lavatory-faucets>

Consumer Reports. (2018a). Ratings : Clean Machines ; Our new Overall Score for dishwashers incorporates predicted reliability and owner satisfaction from our surveys with performance test results. The dishwashers below are all Energy Star certified , so check online for utility r. *Consumer Reports*.



Consumer Reports. (2018b). Ratings : Cleans Up Nicely ; This month debuts our new Overall Score for washers and dryers , which incorporates predicted reliability and owner satisfaction from our surveys with performance test results . See details on. *Consumer Reports*.

Consumer Reports. (2018c). Ratings : Game of Thrones ; Full ratings for single-flush, dual-flush, and wall- mounted toilets . *Consumer Reports*.

Delta. (n.d.-a). *Bathroom Sink Faucets*. Retrieved September 20, 2019, from <https://www.deltafaucet.com/bathroom/sink>

Delta. (n.d.-b). *Kitchen Sink Faucets*. Retrieved September 13, 2019, from <https://www.deltafaucet.com/kitchen/faucets/sink-faucets>

Delta. (n.d.-c). *PRELUDE® Elongated Toilet*. Retrieved September 6, 2019, from <https://www.deltafaucet.com/bathroom/product/C43901-WH>

Delta. (n.d.-d). *Showerheads & Handshowers*. Retrieved October 7, 2019, from <https://www.deltafaucet.com/bathroom/showering/showerheads--handshowers>

Delta. (n.d.-e). *Single Handle Centerset Bathroom Faucet*. Retrieved June 29, 2019, from <https://www.deltafaucet.com/bathroom/product/B510LF-PPU-ECO>

Delta. (n.d.-f). *Single Handle Pull-down Kitchen Faucet with Soap Dispenser*. Retrieved June 29, 2019, from <https://www.deltafaucet.com/kitchen/product/19933-SPSD-DST>

Delta. (n.d.-g). *TURNER® Elongated Toilet*. Retrieved September 4, 2019, from <https://www.deltafaucet.com/bathroom/product/c43908-wh>

Energy Star. (n.d.). *Certified Products*. Retrieved June 29, 2019, from <https://www.energystar.gov/productfinder/product/certified-clothes-washers/results>

Gerber. (n.d.). *GWS21818*. Retrieved September 6, 2019, from <https://www.gerberonline.com/product/WS-21-818>

Grohe. (n.d.). *Grohe Shower Collections*. Retrieved October 7, 2019, from [https://www.grohe.us/en\\_us/bathroom/shower-collections/](https://www.grohe.us/en_us/bathroom/shower-collections/)

Hansgrohe. (n.d.). *Showers and Shower Heads*. Retrieved October 7, 2019, from <https://www.hansgrohe-usa.com/bath/products/showers/showerheads>

Kenmore. (n.d.-a). *Kenmore 14523 24" Built-In Dishwasher with Turbo Heat Dry and Spray Jets - Stainless Steel*. Retrieved July 25, 2019, from <https://www.kenmore.com/products/kenmore-14523-24-built-in-dishwasher-w-turbo-heat-dry-stainless-steel/>

Kenmore. (n.d.-b). *Kenmore 14543 24" Built-In Dishwasher with Third Rack - Stainless Steel*. Retrieved July 23, 2019, from <https://www.kenmore.com/products/kenmore-24-built-in-dishwasher-w-removable-third-rack-stainless-steel/>



Kenmore. (n.d.-c). *Kenmore 14573 24" Dishwasher with Third Rack and PowerWave Spray Arm - Stainless Steel*. Retrieved July 25, 2019, from <https://www.kenmore.com/products/kenmore-14573-24-built-in-dishwasher-w-removable-third-rack-stainless-steel/>

Kenmore. (n.d.-d). *Kenmore 26132 4.8 cu. ft. Top Load Washer w/Detergent & Softener Dispenser - White ENERGY STAR*. Retrieved July 23, 2019, from <https://www.kenmore.com/products/kenmore-26132-4-8-cu-ft-top-load-washer-white/>

Kenmore. (n.d.-e). *Kenmore 27132 4.8 cu. ft. Top Load Washer w/Steam Treat - White ENERGY STAR Certified*. Retrieved July 25, 2019, from <https://www.kenmore.com/products/kenmore-27132-4-8-cu-ft-top-load-washer-white/>

Kenmore. (n.d.-f). *Kenmore 28132 5.3 cu. ft. Top Load Washer w/StainBoost Option - White ENERGY STAR Certified*. Retrieved July 25, 2019, from <https://www.kenmore.com/products/kenmore-28132-5-3-cu-ft-top-load-washer-w-triple-action-impeller-white/>

Kenmore. (n.d.-g). *Kenmore Elite 12793 Dishwasher with 360° PowerWash Plus/SmartDry - Stainless Exterior with Stainless Interior Tub at 39dBa*. Retrieved July 26, 2019, from <https://www.kenmore.com/products/kenmore-elite-12793-24-built-in-dishwasher-stainless-steel/>

Kenmore. (n.d.-h). *Kenmore Elite 14793 Dishwasher w/Turbo Zone Reach/360 Power Wash - Stainless Steel*. Retrieved July 26, 2019, from <https://www.kenmore.com/products/kenmore-elite-14793-24-built-in-dishwasher-stainless-steel/>

Kenmore. (n.d.-i). *Kenmore Elite 31433 5.0 cu. ft. Smart Top Load Washer w/Accela Wash® - Metallic ENERGY STAR Certified*. Retrieved July 25, 2019, from <https://www.kenmore.com/products/kenmore-elite-31433-smart-5-0-cu-ft-top-load-front-control-washer-with-accela-wash-metallic-silver/>

Kenmore. (n.d.-j). *Kenmore Elite 31552 5.2 cu. ft. Top Load Washer w/Accela Wash® & Steam - White ENERGY STAR Certified*. Retrieved July 25, 2019, from <https://www.kenmore.com/products/kenmore-elite-31552-5-2-cu-ft-top-load-washer-w-steam-treat-174-accela-wash-174-white/>

Kenmore. (n.d.-k). *Kenmore Elite 41072 5.2 cu. ft. Front-Load Washer with Steam Treat – White*. Retrieved July 23, 2019, from <https://www.kenmore.com/products/kenmore-elite-41072-5-2-cu-ft-front-load-washer-white/>

Kenmore. (n.d.-l). *Kenmore Elite 41982 5.2 cu. ft. Smart Front-Load Washer w/ Accela Wash Technology – White*. Retrieved July 23, 2019, from <https://www.kenmore.com/products/kenmore-elite-41982-smart-5-2-cu-ft-front-load-washer-w-accela-wash-technology-white/>

KitchenAid. (n.d.-a). *43 dBA Dishwasher with Clean Water Wash System*. Retrieved July 23, 2019, from <https://www.kitchenaid.com/major-appliances/dishwashers/integrated-control/p.43-dba-dishwasher-with-clean-water-wash-system.kdtm354dss.html>

KitchenAid. (n.d.-b). *44 dBA Dishwasher with Dynamic Wash Arms*. Retrieved July 26, 2019, from <https://www.kitchenaid.com/major-appliances/dishwashers/integrated-control/p.44-dba-dishwasher-with-dynamic-wash-arms.kdtm404ess.html>



KitchenAid. (n.d.-c). *44 dBA Dishwasher with Dynamic Wash Arms and Bottle Wash*. Retrieved July 26, 2019, from <https://www.kitchenaid.com/major-appliances/dishwashers/integrated-control/p.44-dba-dishwasher-with-dynamic-wash-arms-and-bottle-wash.kdtm704ess.html>

Kohler. (n.d.-a). *Cimarron® Comfort Height®The Complete Solution® two-piece elongated 1.28 gpf chair height toilet with slow close seat*. Retrieved September 3, 2019, from <https://www.us.kohler.com/us/catalog/productDetails.jsp?productId=426575>

Kohler. (n.d.-b). *Faucet Families*. Retrieved September 20, 2019, from [https://www.us.kohler.com/us/browse/bathroom-bathroom-faucets-faucet-families/\\_/N-2dkxZ2e84?Nr=AND%28product.language%3AEnglish%2CP\\_market%3AKPNASite%29](https://www.us.kohler.com/us/browse/bathroom-bathroom-faucets-faucet-families/_/N-2dkxZ2e84?Nr=AND%28product.language%3AEnglish%2CP_market%3AKPNASite%29)

Kohler. (n.d.-c). *Highline® Classic Comfort Height®*. Retrieved July 26, 2019, from <https://www.us.kohler.com/us/catalog/productDetails.jsp?productId=423903>

Kohler. (n.d.-d). *Kelston® Comfort Height®Two-piece elongated 1.6 gpf chair height toilet*. Retrieved September 4, 2019, from <https://www.us.kohler.com/us/catalog/productDetails.jsp?productId=427663>

Kohler. (n.d.-e). *Kitchen Sink Faucets*. Retrieved September 13, 2019, from [https://www.us.kohler.com/us/browse/kitchen-kitchen-sink-faucets/\\_/N-2d8u](https://www.us.kohler.com/us/browse/kitchen-kitchen-sink-faucets/_/N-2d8u)

Kohler. (n.d.-f). *Santa Rosa™ Comfort Height®*. Retrieved September 3, 2019, from <https://www.us.kohler.com/us/catalog/productDetails.jsp?productId=428441>

Kohler. (n.d.-g). *Showerheads*. Retrieved October 7, 2019, from [https://www.us.kohler.com/us/browse/bathroom-showering-showerheads/\\_/N-2dbd](https://www.us.kohler.com/us/browse/bathroom-showering-showerheads/_/N-2dbd)

Kraus. (n.d.-a). *Bathroom Faucets*. Retrieved September 7, 2019, from <https://www.kraususa.com/bathroom/bathroom-faucets.html>

Kraus. (n.d.-b). *Kitchen Faucets*. Retrieved September 13, 2019, from <https://www.kraususa.com/kitchen/kitchen-faucets.html>

LG. (n.d.-a). *5.0 cu. ft. Large Smart wi-fi Enabled Front Control Top Load Washer with TurboWash®*. Retrieved July 25, 2019, from <https://www.lg.com/us/washers/lg-WT1901CW-top-load-washer>

LG. (n.d.-b). *5.2 cu. ft. Large Smart wi-fi Enabled Front Load Washer TurboWash®*. Retrieved June 29, 2019, from <https://www.lg.com/us/washers/lg-WM9000HVA-front-load-washer>

Mead, N., & Aravinthan, V. (2009). Investigation of household water consumption using smart metering system. *Desalination and Water Treatment*, 11(1–3), 115–123.

Moen. (n.d.-a). *Bathroom Sink Faucets*. Retrieved September 20, 2019, from <https://www.moen.com/bathroom/faucets/sink-faucets>

Moen. (n.d.-b). *Bathtub and Shower Faucets*. Retrieved October 7, 2019, from [https://www.moen.com/bathroom/faucets/tub-shower-faucets?\\_start=0&\\_size=20](https://www.moen.com/bathroom/faucets/tub-shower-faucets?_start=0&_size=20)



Moen. (n.d.-c). *Kitchen Faucets*. Retrieved September 13, 2019, from [https://www.moen.com/kitchen/faucets/kitchen?\\_start=0&\\_size=20&\\_sort=Popularity](https://www.moen.com/kitchen/faucets/kitchen?_start=0&_size=20&_sort=Popularity)

Pfister. (n.d.). *Selia 2-Handle 4" Centerset Bathroom Faucet*. Retrieved June 29, 2019, from <https://www.pfisterfaucets.com/bathroom/product/selia-pf-048-sl-2-handle-4-centerset-bathroom-faucet?modelNumber=LF-048-SLCC>

Samsung. (2015). *Top Control Dishwasher with Stainless Steel Tub*. <https://www.samsung.com/us/home-appliances/dishwashers/rotary/dw80f600uts-top-control-dishwasher-with-stainless-steel-tub-stainless-steel-dw80f600uts-aa/>

Samsung. (n.d.-a). *4.5 cu. ft. AddWash™ Front Load Washer in White*. Retrieved July 23, 2019, from <https://www.samsung.com/us/home-appliances/washers/front-load/wf6500-4-5-cu-ft-addwash-front-load-washer-white-wf45k6500aw-a2/#specs>

Samsung. (n.d.-b). *5.0 cu. ft. AddWash™ Front Load Washer in White*. Retrieved June 29, 2019, from <https://www.samsung.com/us/home-appliances/washers/front-load/wf7500-5-0-cu-ft-addwash-front-load-washer-white-wf50k7500aw-a2/#specs>

Samsung. (n.d.-c). *How much water does my Samsung washing machine use per cycle?* Retrieved June 29, 2019, from <https://www.samsung.com/uk/support/home-appliances/how-much-water-does-my-samsung-washing-machine-use-per-cycle/>

Speakman. (n.d.). *Shower Heads*. Retrieved October 7, 2019, from <https://speakman.com/product-category/bathroom/shower-heads/>

St. Thomas. (n.d.). *RICHMOND TWO-PIECE TOILET*. Retrieved September 3, 2019, from <http://www.stcbath.com/cproduct.php?productID=62>

Surn. (n.d.) Z5551-K Retrieved September 6, 2019, from <https://www.zurn.com/products/finish-plumbing/fixtures/toilets/z5551-k>

TOTO. (n.d.-a). *Drake® II Two-Piece Toilet, 1.28 GPF, Elongated Bowl*. Retrieved September 6, 2019, from <https://www.totousa.com/drake-ii-two-piece-toilet-128-gpf-elongated-bowl>

TOTO. (n.d.-b). *Drake® Two-Piece Toilet, 1.6 GPF, Elongated Bowl*. Retrieved September 3, 2019, from <https://www.totousa.com/drake-two-piece-toilet-16-gpf-elongated-bowl>

TOTO. (n.d.-c). *Eco Drake® Two-Piece Toilet, 1.28 GPF, Elongated Bowl*. Retrieved September 4, 2019, from <https://www.totousa.com/eco-drake-two-piece-toilet-128-gpf-elongated-bowl>

Vigo. (n.d.-a). *Bathroom Faucets*. Retrieved September 20, 2019, from <https://www.vigoindustries.com/bathroom-collection/bathroom-faucet-collection>

Vigo. (n.d.-b). *Kitchen Faucets*. Retrieved September 13, 2019, from <https://www.vigoindustries.com/kitchen-collection/kitchen-faucets>

Ward, D. O., Clark, C. D., Jensen, K. L., Yen, S. T., & Russell, C. S. (2011). Factors influencing willingness-to-pay for the ENERGY STAR® label. *Energy Policy*, 39(3), 1450-1458.



Whirlpool. (n.d.). *ENERGY STAR® certified dishwasher with Sensor cycle*. Retrieved July 26, 2019, from <https://www.whirlpool.com/kitchen/dishwasher-and-cleaning/dishwashers/built-in-visible-front-console/p.energy-star-certified-dishwasher-with-sensor-cycle.wdf540padm.html>
